# Supplementary material for: Quality of care for tuberculosis and HIV in the private health sector: a cross-sectional, standardised patient study in South Africa
Source: PubMed Central journal article supplement (PMC8127976; doi:10.1136/bmjgh-2021-005250), 2021-05-14
Supplement: bmjgh-2021-005250supp001.pdf [file bmjgh-2021-005250supp001.pdf]

**Supp 1: Consent Diagram**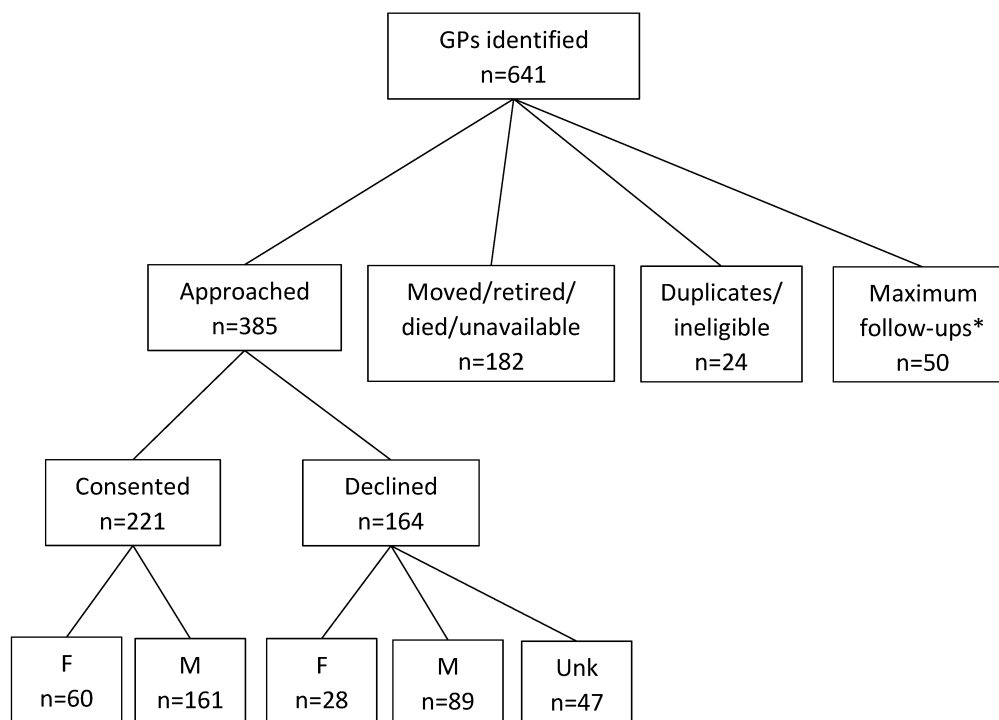

\*GPs were approached a maximum of 5 times by recruitment staff  
Abbreviations: GPs=general practitioners, Unk=unknown
